# Supplementary material for: High performance self-powered photodetection with a low detection limit based on a two-dimensional organometallic perovskite ferroelectric
Source: Royal Society of Chemistry journal article supplement (doi:10.1039/d0tc04777e), 2020-10-26
Supplement: d0tc04777e1.pdf [file d0tc04777e1.pdf]

## Support Information

### Experimental Section

**Synthesis and crystal growth:** All reagents and solved used in the synthesis are commercially available.  $\text{Pb}(\text{CH}_3\text{COO})_2 \cdot 3\text{H}_2\text{O}$  (3.79 g, 10 mmol) was dissolved in 40% w/w aqueous HBr solution (30.0 mL) by heating to boiling under constant magnetic stirring to give a yellowish solution. Subsequent addition of formamidiniumacetate (0.512 g, 6.67 mmol) to the hot solution formed red precipitation, which dissolved under stirring to afford a yellow solution. Moreover,  $\text{n-CH}_3(\text{CH}_2)_3\text{NH}_2$  (0.49 g, 6.67 mmol) was added to the above solution to afford a yellow precipitate, which was subsequently dissolved under heating the solution to boiling. As the solution was subjected to a controlled cooling rate of  $0.5^\circ\text{C/h}$  to  $65^\circ\text{C}$ , the small crystallite formed on the solution surface. When the temperature was further lowered to  $55^\circ\text{C}$ , the crystallite grew large enough to begin to slowly sink to the bottom of the container. As we allowed the process to continue until the temperature dropped to  $30^\circ\text{C}$ , a bigger single crystal was harvested. The powder X-ray diffraction further verified the purity of 1 (Figure S1). Powder X-ray diffractometry (PXRD) data were recorded on a Mini Flex II Powder X-ray diffractometer.

**Ferroelectric measurements:** The temperature-dependent  $P$ - $E$  hysteresis loops and  $I$ - $E$  curves were measured on a ferroelectric analyzer (Radiant Precision Premier II) using the double-wave method. To avoid electric discharge at high electric field, single crystal of 1 was immersed in silicone oil to measure the  $P$ - $E$  hysteresis loops. The temperature was carefully controlled by an oil bath. Two pairs of electrodes were formed orthogonally with each other on a single crystal of 1 with carbon paste.

**Optical measurements:** The UV absorptions in solid state were measured at room temperature on a PE Lambda 900 UV-Visible spectrophotometer. The fluorescence measurements were performed on an Edinburgh Analytical instrument FLS920. The conoscopic interference pattern was observed using a Nikon Eclipse LV100POL polarizing microscope. The temperature during measurements was controlled at 290 K using a Linkam TS1500 heating stage.

**Photoelectric measurements:** Photoelectric measurements were performed with a planar electrode configurations. Two symmetric Au electrodes with a defined gap of  $200\ \mu\text{m}$  were sputtered on the flat side of a well-polished single crystal. The electrode materials were proven not to have any obvious influence on the photoelectric properties. Before the photoelectric measurements, the sample was poled by a nonpolar electrical plus in field strength range of  $-20$ - $30\ \text{KV/cm}$ . The current vs voltage ( $I$ - $V$ ) and photocurrent vs time ( $I$ - $t$ ) with light on or off (measured at zero bias) were measured using a high precision electrometer (Keithley6517B). A THORLABS 405 nm pigtailed laser diode (LP405-MF300,  $200\ \text{mW/cm}^2$ ) was used for visible light illumination. The incident light intensity was measured by light power meter. The transient photoresponse time was measured using a 1 GHz bandwidth oscilloscope (Tektronix MDO3104) under a nanosecond 355 nm laser (pulse width  $\sim 2\ \text{ns}$ ) at zero bias. The temperature during measurements was controlled at 290 K using a Linkam TS1500 heating stage.

Respond time was recorded by the high-speed Tektronix MDO3014 Oscilloscope. Conductivity was tested in the heating mode with range from 300-400 K by using a direct-current two-terminal method. The UV absorptions in solid state were measured at room temperature on a PE Lambda 900 UV-Visible spectrophotometer. The fluorescence measurements were performed on an Edinburgh Analytical instrument FLS920. The responsivity ( $R$ ) of and the corresponding detectivity ( $D^*$ ) of the device are calculated from the following equations:

$$R = (I_{\text{on}} - I_{\text{off}}) / P_{\text{in}}$$

$$D^* = R / (2qI_{\text{off}}/S)^{1/2}$$

where  $I_{\text{on}}$  is the photocurrent,  $I_{\text{off}}$  is the dark current,  $P_{\text{in}}$  is the incident light power,  $S$  is the effective area of light, and  $q$  is the electron charge.

## Figures

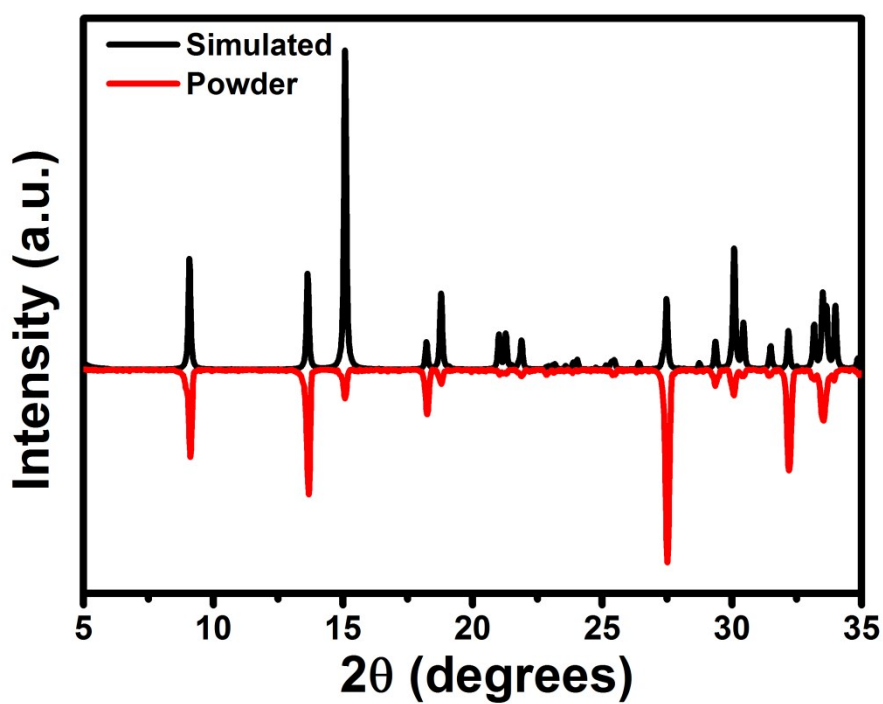

Figure S1. Experimental and simulated PXRD patterns for **1**.

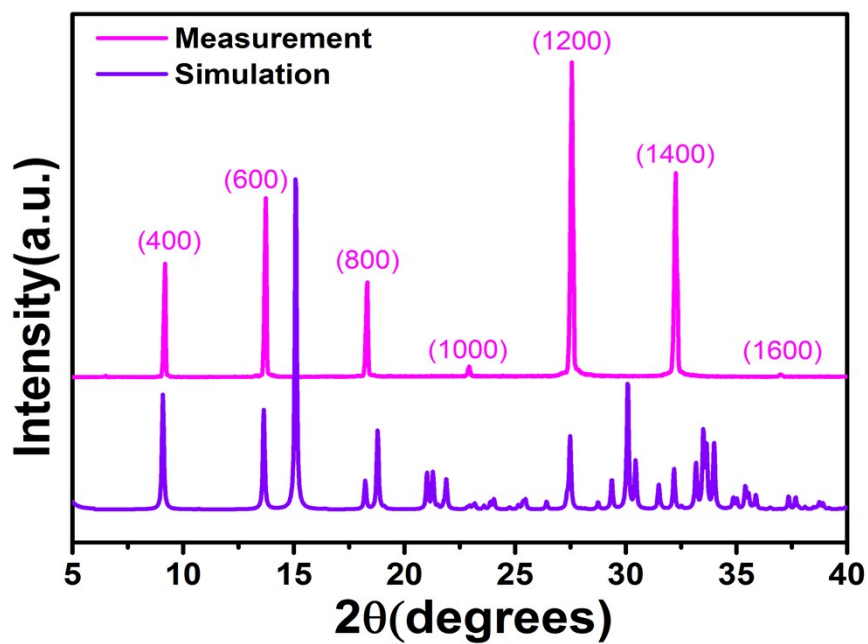

Figure S2. XRD patterns of the crystallographic facets of **1** showing high crystalline quality. The purple and pink curves indicate simulated and experimental XRD patterns, respectively.

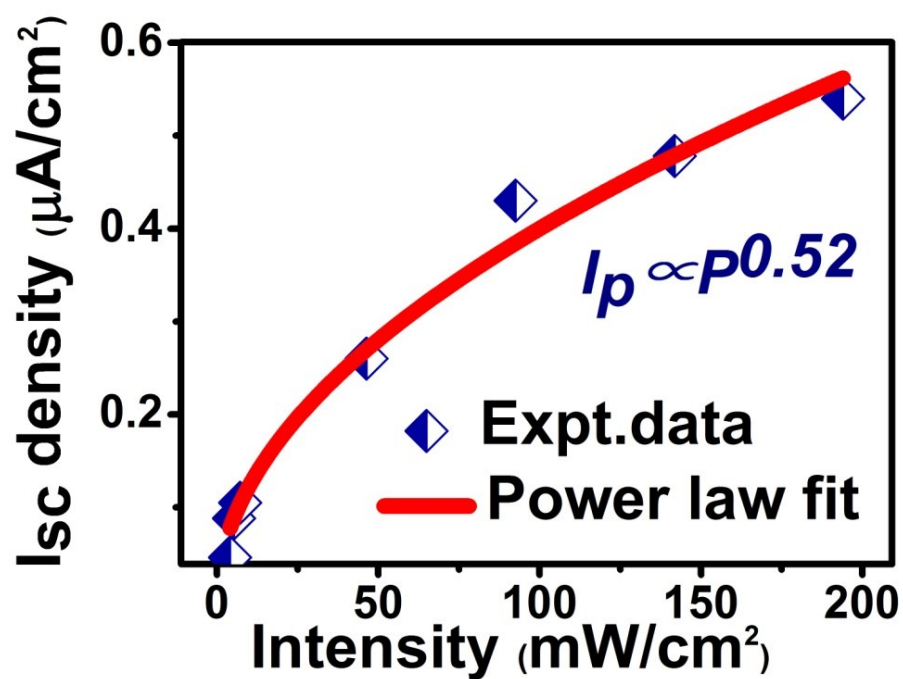

Figure S3. power law fitting of the relation between  $I_{sc}$  and light intensity.

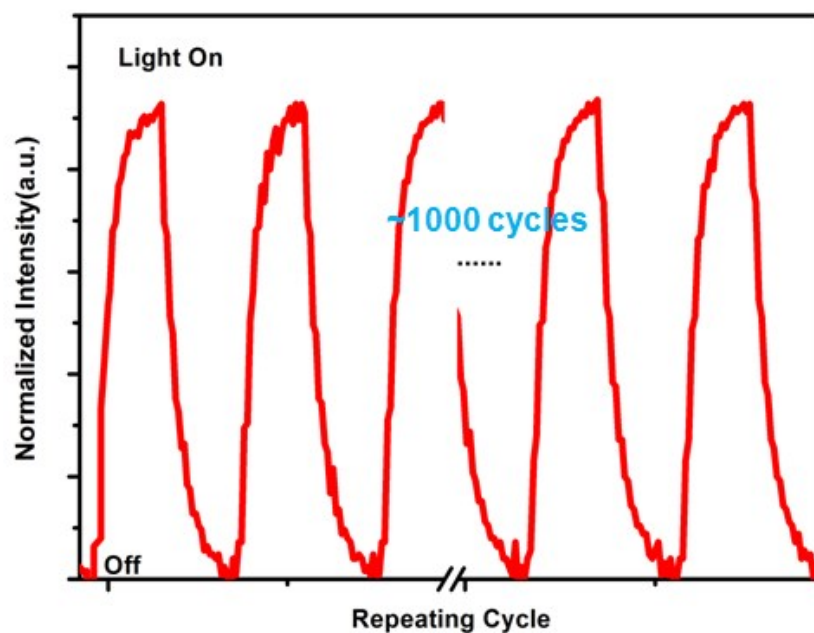

Figure S4. Repetitive switching cycles of photoresponse for 1, showing no obvious attenuation.

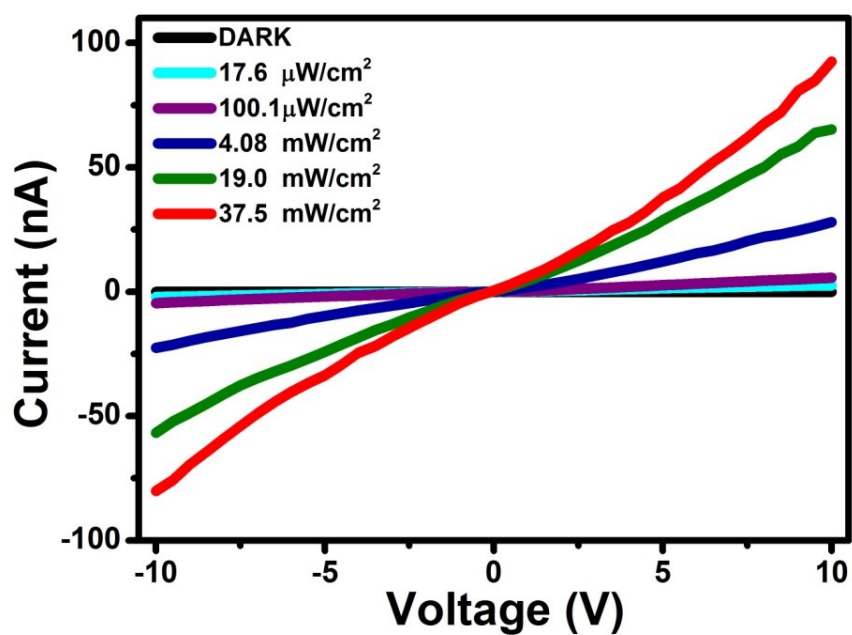

**Figure S5.** I–V curves of the **1** single crystal photodetector measured in dark and under illumination with different light intensities. **1** exhibits sizable on/off current ratios ( $\sim 10^4$ ).

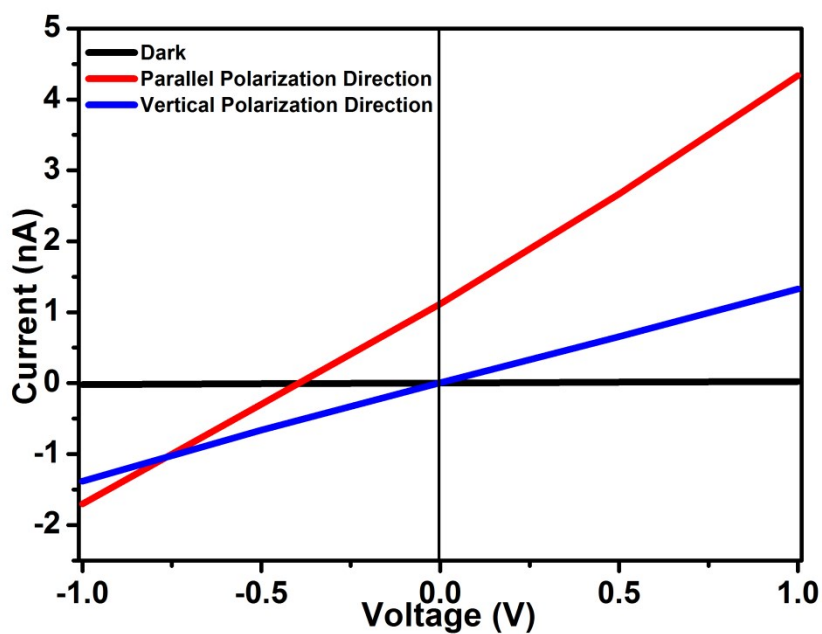

**Figure S6.** I–V traces measured along the polarization revealing a strong photovoltaic behavior. I–V traces collected perpendicular to its polarization direction.

**Table S1 Basic parameters of semiconductors used in self-powered photodetectors.**

| Self-powered Photodetectors                        | $V_{oc}$      | $I_{sc}$       | Detection Limit               | Responsivity                 | Detectivity (Jones)         | Rise Time                    | Decay Time                   |
|----------------------------------------------------|---------------|----------------|-------------------------------|------------------------------|-----------------------------|------------------------------|------------------------------|
| WSe <sub>2</sub> /MoS <sub>2</sub> <sup>1</sup>    | ~0.27 V       | ~0.22 $\mu$ A  | 0.50 $\mu$ W cm <sup>-1</sup> | 44 mA W <sup>-1</sup>        | -                           | -                            | -                            |
| g-C <sub>3</sub> N <sub>4</sub> -PVDF <sup>2</sup> | ~2.7 V        | -              | 0.10 mW cm <sup>-1</sup>      | 1.7 $\mu$ A W <sup>-1</sup>  | -                           | 6.2 s                        | 12.9 s                       |
| BiFeO <sub>3</sub> <sup>3</sup>                    | ~0.7 V        | -              | 45 $\mu$ W cm <sup>-1</sup>   | 0.66 mA W <sup>-1</sup>      | 5.13×10 <sup>7</sup>        | -                            | -                            |
| BaTiO <sub>3</sub> <sup>4</sup>                    |               | ~40 nA         | 3.5 mW cm <sup>-1</sup>       | 0.45 $\mu$ A W <sup>-1</sup> | 4×10 <sup>5</sup>           | -                            | 1.6 s                        |
| PZT <sup>5</sup>                                   | ~2.85 V       | ~28.76 nA      | 15.7 mW cm <sup>-1</sup>      | 1 V W <sup>-1</sup>          | -                           | 2.2 s                        | 22.6 s                       |
| Polyaniline/MgZnO <sup>6</sup>                     | ~2.5 V        | ~0.44 pA       | 130 $\mu$ W cm <sup>-1</sup>  | 160 $\mu$ A W <sup>-1</sup>  | 1.5×10 <sup>11</sup>        | 4.8 S                        | 5.1 S                        |
| ZnO microwire/p-Si films <sup>7</sup>              | ~2 V          | ~71 nA         | 0.58 mW cm <sup>-1</sup>      | -                            | -                           | <0.3 S                       | <0.3 S                       |
| <b>Present Work</b>                                | <b>~0.4 V</b> | <b>~2.2 nA</b> | <b>82 nW cm<sup>-1</sup></b>  | <b>0.51mA W<sup>-1</sup></b> | <b>1.47×10<sup>12</sup></b> | <b>220 <math>\mu</math>s</b> | <b>370 <math>\mu</math>s</b> |

## References

1. R. Cheng, D. H. Li, H. L. Zhou, C. Wang, A. X. Yin, S. Jiang, Y. Liu, Y. Chen, Y. Huang and X. F. Duan, *Nano Letters*, 2014, **14**, 5590-5597.
2. J. G. Yu, L. P. Dong, B. Peng, L. Yuan, Y. Huang, L. C. Zhang, Y. M. Zhang and R. X. Jia, *J. Alloy. Compd.* 2020, **821**,153532.
3. R. D. Zhao, N. Ma, K. Song and Y. Yang, *Adv. Funct. Mater.* 2020, **30**,1906232.
4. N. Ma, K. W. Zhang and Y. Yang, *Adv. Mater.* 2017, **29**,1703694.
5. K. Song, N. Ma and Y. Yang, *Adv. Mater. Technol.* 2017, **2**,1700221.
6. H. Chen, P. Yu, Z. Zhang, F. Teng, L. Zheng, K. Hu and X. Fang, *Small*, 2016, **12**, 5809-5816.
7. J. Qi, X. Hu, Z. Wang, X. Li, W. Liu and Y. Zhang, *Nanoscale*, 2014, **6**, 6025-6029.
